# Supplementary material
Source: PubMed Central journal article supplement (PMC3754162)
Supplement: AEM.00950-13_zam999104705so1.pdf [file AEM.00950-13_zam999104705so1.pdf]

Table S1. Primers used to amplify and sequence CRISPR arrays in *E. coli* isolates

| <b>Name</b>         | <b>Primer Sequences (5'-3')</b> | <b>Note</b>                              |
|---------------------|---------------------------------|------------------------------------------|
| C1F1 <sup>a,b</sup> | TCTCTTCTTTGCAGGGAGGC            | Amplification and sequencing CRISPR1     |
| C1F2 <sup>a</sup>   | GAAAATGTCCCTCCGCGCTTACG         | Amplification and sequencing CRISPR1     |
| C1R1                | AATAGAACGTCGCTGCCGTGA           | Amplification and sequencing CRISPR1     |
| C2bF1               | CCTCATGTTCAAAATAGCTCTCCA        | Amplification and sequencing<br>CRISPR2b |
| C2bR1 <sup>a</sup>  | CGATCCAGAGCTGGTCGAATG           | Amplification and sequencing<br>CRISPR2b |
| C2aF1               | GGCATTAAATTTTCGCTGGA            | Amplification and sequencing<br>CRISPR2a |
| C2aR1               | GAACATGAGGTGTTACGTGGA           | Amplification and sequencing<br>CRISPR2a |
| C1I1 <sup>c</sup>   | CCTGGATACGAGAACAAATT            | Sequencing internal region of CRISPR1    |
| C1I2 <sup>c</sup>   | TTACCACCCAGACACTGATA            | Sequencing internal region of CRISPR1    |
| C1I3 <sup>d</sup>   | AACGGGAACAGGGCAAATGT            | Sequencing internal region of CRISPR1    |
| C1I4 <sup>d</sup>   | CTGAAACCAGTTGGCTCGTT            | Sequencing internal region of CRISPR1    |

<sup>a</sup> Primers from Díez-Villaseñor et al (2010)

<sup>b</sup> Forward primer for isolates without CAS-E system

<sup>c</sup> Internal sequencing primer for *E. coli* O6 isolates

<sup>d</sup> Internal sequencing primer for *E. coli* O174 isolates
